# Supplementary material for: Primate malarias: Diversity, distribution and insights for zoonotic Plasmodium
Source: PubMed Central journal article supplement — One Health. 2015 Oct 24;1:66–75. doi: 10.1016/j.onehlt.2015.10.001 (PMC5441356; doi:10.1016/j.onehlt.2015.10.001), 2015-10-24
Supplement: mmc1.pdf [file mmc1.pdf]

## APPENDICIES

### Text A.1:

#### I. Notes on Survey Data

#### II. Survey References by Region

### Figures:

#### Fig A.1. Phylogeny of Sampling Effort with Prosimians

**Fig A.2. Primate *Plasmodium* species accumulation curves by region.** Minimum sampling effort to detect *Plasmodium* infection by region is indicated by blue lines. Tan accumulation curves are created from all non-human primate data from the region.

### Tables

**Table A.1** Primate malaria parasites with hosts and geographic ranges

**Table A.2** Raw survey data

**Table A.3** Observed and expected malaria parasites by primate host species

**Table A.4** Primate hosts, countries *Plasmodium* positive, and first records for Africa

**Table A.5** Primate hosts, countries *Plasmodium* positive, and first records for America

**Table A.6** Primate hosts, countries *Plasmodium* positive, and first records for Asia

## I. NOTES ON SURVEYS

---

Schmidt et al. 1961 reports naturally infected *M. mulatta*. 22 of 228 animals that were imported from Dacca (presumably Dakar, Bangladesh), but originally from East Pakistan, were positive. Whether these individuals were infected from their origin (Pakistan) or infected close to the Assam- Burma (India- Myanmar) border is not known. The author implies that these individuals had been held in a new location before exportation. Thus, infection could have occurred in Northeastern India. This would be less surprising, as it is within the range of the simian malaria vectors *Anopheles leucosphyrus*.

Liu et al. 2011 and Liu et al. 2014 report sensitivities and suspected sampling rates for individuals. We used these probabilities to extrapolate prevalence for chimpanzees and gorillas at each site. The outcomes are given in Table S2 but the conversion file will be made available upon request.

For surveys that included multiple samples from known individuals (i.e. De Nys et al. 2013), we created a dataset from the reported data and sampled randomly from it to estimate prevalence. This was repeated 10,000 times to get an estimate of prevalence in the population and the extrapolated number of infected individuals was used in Table S2.

Lastly, many of the ape malarias have received multiple names throughout the century. Early work was summarized by P.C.C. Garnham in his 1966 textbook and concluded that there were three ape malarias:

- ***P. reichenowi* infects chimpanzees** (Reichenow 1920, Blacklock and Adler 1923, Schwetz 1933). This is the only ape malaria that has both a morphological and molecular characterization. It originally was described as *P. falciparum*, but is morphologically and molecularly distinguishable from human parasites.
- ***P. malariae* infects chimpanzees** (Reichenow 1920, Blacklock and Adler 1923, Schwetz 1933). *P. rodhaini* is also mentioned in the literature, however Garnham (1966) and Coatney et al. (1971) review the literature and present ample evidence that it was *P. malariae*. It has morphological similarities to human *P. malariae* and multiple researchers were able to infect humans with '*P.*

*rodhaini*' and chimps with '*P. malariae*'. We changed historical records that identified species as *P. rodhaini* to *P. malariae*.

- ***P. schwetzi* infects chimpanzees and gorillas** (REichenow 1920, Blacklock and Adler 1923, Schwetz 1933). Contacos and colleagues (1970) demonstrated that this species could be transmitted to man, but before that all infection trials had failed. The parasite is usually found coinfecting with other malaria parasites. It has been described as *Plasmodium vivax*-like and *P. ovale*- like in its morphology.

All surveys of apes before 2009, reported only one of three of these malarias (*P. schwetzi* was the only malaria confirmed in *Gorilla gorilla*). While there now seems to be a much greater diversity, we left surveys with the original species identification. Unfortunately, only *P. reichenowi* has been molecularly characterized (Escalante et al. 1994) of the original 3 morphologically described ape malarias.

After 2009, there was an explosion of molecularly characterized malaria species from African apes and monkeys. Five new species have been described based on molecular data in the *Laverania* subgenus. *Laverania* is a monophyletic clade that infects apes and includes the malignant human malaria *P. falciparum*:

- ***P. falciparum* infects humans, but is also found in chimpanzees, gorillas, bonobos, and *Cercopithecus nictitans*.** Following lumping strategies purported by Coatney et al. (1971), we include *P. praefalciparum* within *P. falciparum*. *P. praefalciparum* has been used to describe *P. falciparum* –like isolates from gorillas. It has been argued that the greater diversity of *P. falciparum* in these apes supports a hypothesis that *P. falciparum* first evolved in gorillas and more recently infected humans through a single host switch event. The diversity found in chimpanzees is much lower. Only one isolate has been found in *C. nictitans*. It is possible that chimpanzees, bonobos, and this monkey are spillover hosts- that the parasites are not endemic in populations. But this requires more study.
- ***P. reichenowi* infects chimpanzees.**
- ***P. billcollinsi* infects chimpanzees.**
- ***P. blacklocki* infects gorillas.**
- ***P. gaboni* infects chimpanzees.**
- ***P. alderi* infects gorillas.**

Additionally, researchers have found parasites that are similar to human parasites. Although new data only has molecular data, morphological data has been used to successfully reconstruct some molecular phylogenies (i.e. Martinsen et al. 2007).

- ***P. vivax* like in chimpanzees & gorillas** (Duval et al. 2010, Kaiser et al. 2010, De Nys et al. 2013, Prugnolle et al. 2013, Liu et al. 2014). In survey data these are identified as *P. vivax*\*
- ***P. ovale* like in chimpanzees** (Duval et al. 2009, Kaiser et al. 2010). In survey data these parasites are recorded as *P. ovale*\*
  - Either of these could be same as *P. schwetzi* reported by early authors (Reichenow 1920, Adler 1923, Bray (cited by Garnham et al. 1966)). *P. schwetzi* has been described as morphological similar to *P. vivax* and to *P. ovale*- depending on the author. However, *P. schwetzi* was found in both chimpanzees and gorillas across a large geographic range, so it might be more likely that *P. schwetzi* is the same as *P. vivax*-like parasites found in gorillas and chimpanzees (Prugnolle et al. 2013, Liu et al. 2014). We have left the species identification as above- at a later date these can be renamed as paired molecular and morphological data emerge.

- ***P. malariae* like in chimpanzees** (Duval et al. 2010, Kaiser et al. 2010). We assume that this is the same as *P. malariae* reported by early authors (Reichenow 1920, Adler 1923, Bray (cited by Garnham et al. 1966)). However more molecular data should be collected to verify this.

## II. SURVEY REFERENCES

---

### AFRICAN SURVEYS

- Ayouba, A, F Mouacha, GH Learn, E Mpoudi-Ngole, JC Rayner, PM Sharp, BH Hahn, E Delaporte, M Peeters. 2012. Ubiquitous *Hepatocystis* infections, but no evidence of *Plasmodium falciparum*-like malaria parasites in wild greater spot-nosed monkeys (*Cercopithecus nictitans*). *Int J Parasit.* **42**(8): 709-713.
- Adler, S. 1923. Malaria in chimpanzees in Sierra Leone. *Ann Trop Med Parasit.* **17**: 13–18.
- Blacklock, B, and S Adler. 1923. A parasite resembling *Plasmodium falciparum* in a chimpanzee. *Ann Trop Med Parasit.* **16**: 99-106.
- Bray, RS. 1959. Range of *Plasmodium gonderi*. *Trans Roy Soc Trop Med & Hyg.* **53**: 300-301.
- Buck, G., J Coudurier, JJ Quesnel. 1952. Sur deux nouveaux plasmodium observes chez un lemurien de Madagascar splenectomis. *Arch Institut Pasteur d' Algerie.* **30**: 240-243.
- De Nys, HM, S Calvignac-Spencer, U Thiesen, C Boesch, P Dorny, RM Wittig, R Mundry, and FH Leendertz. 2013. Age-related effects on malaria parasite infection in wild chimpanzees. *Biology Letters.* **9**: 20121160.
- Duval, L, E Nerrienet, D Rousset, SAS Mba, S Houze, M Fourment, J Le Bras, V Robert, and F Ariey. 2009. Chimpanzee Malaria Parasites Related to *Plasmodium ovale* in Africa. *PLoS ONE.* **4**(5): e5520.
- Duval, L, M Fourment, E Nerrienet, D Rousset, SA Sadeuh, SM Goodman, NV Andriaholinirina, M Randrianarivojosia, RE Paul, and V Robert. 2010. African apes as reservoirs of *Plasmodium falciparum* and the origin and diversification of the *Laverania* subgenus. *PNAS.* **107**(23): 10561-10566.
- Garnham, PCC, RB Heisch, and DM Minter. 1961. The vector of *Hepatocystis* (= *Plasmodium*) *kochi*; The successful conclusion of observations in many parts of tropical Africa. *T Roy Soc Trop Med Hyg.* **55**(6): 497-502.
- Garnham, PCC, R Lainson, and W Cooper. 1958. The complete life cycle of a new strain of *Plasmodium gonderi* from the drill (*Mandrillus leucophaeus*), including its sporogony in *Anopheles aztecus* and its pre-erythrocytic schizogony in the rhesus monkey. *T Roy Soc Trop Med Hyg.* **52**: 509–517.
- Garnham, PCC. 1966. *Malaria Parasites and other Haemosporidia*. Blackwell Scientific Publications, Oxford, UK.
- Huff, CG and H Hoogstraal. 1963. *Plasmodium lemuri* n. sp. from *Lemur collaris*. *J Inf Dis.* **112**:233-236.

- Jeneby, M. 2011. Haemoprotozoan Parasites of Non-Human Primates in Kenya. Studies on Prevalence and Characterization of Haemoprotozoan Parasites of Wild-Caught Baboons, African Green Monkeys and Syke's Monkeys. *Acta Universitatis Upsaliensis. Digital Comprehensive Summaries of Uppsala Dissertations from the Faculty of Medicine* 663. 52 pp. Uppsala. ISBN 978-91-554-8049-3.
- Kaiser, M, A Lova, M Ulrich, H Ellerbrok, AS Goffe, A Blasse, Z Zommers, E Couacy-Hymann, F Babweteera, K Zuberbuhler, S Metzger, S Geidel, C Boesch, TR Gillespie, and FH Leendertz. 2010. Wild Chimpanzees Infected with 5 *Plasmodium* Species. *Emerg Inf Dis.* **16**(12): 1956-1959.
- Keymer, IF. 1971. Blood protozoa of insectivores, bats and primates in Central Africa. *J Zool, Lond.* **163**: 421-441.
- Krief S, AA Escalante, MA Pacheco, L Mugisha, C André, M Halbwax, A Fischer, J-M Krief, JM Kasenene, M Crandfield, OE Cornejo, J-M Chavatte, C Lin, F Letourneur, AC Gruener, TF McCutchan, L Renia, G Snounou. 2010. On the Diversity of Malaria Parasites in African Apes and the Origin of *Plasmodium falciparum* from Bonobos. *PLoS Pathog.* **6**(2): e1000765.
- Kuntz, RE and BJ Myers. 1967. Parasites of the Kenya baboon: Arthropods, blood protozoa and helminths (Kenya, 1966). *Primates.* **8**: 75-82.
- Leathers, CW. 1978. Prevalence of *Hepatozoon kochi* in African Green Monkeys. *Laboratory Animal Science.* **28**(2): 186-189.
- Liu, W. et al. 2010. Origin of the human malaria parasite *Plasmodium falciparum* in gorillas. *Nature.* **467**: 420-425.
- Liu, W. et al. 2014. African origin of the malaria parasite *Plasmodium vivax*. *Nat Commun.* 5:3346. doi: 10.1038/ncomms4346.
- Ollomo, B, S Karch, P Bureau, N Elissa, A.J Georges, and P Millet. 1997. Lack of malaria parasite transmission between apes and humans in Gabon. *AJTMH.* **56**(4): 440-445.
- Ollomo, B, P Durand, F Prugnolle, E Douzery, C Arnathau, D Nkoghe, E Leroy, and F Renaud. 2009. A new malaria agent in African hominids. *PLoS Pathog.* **5**(5): e1000446.
- Poirrez, J, D Baccam, E Dei-Cas, T Brogan, and I Landau. 1993. Description de *Plasmodium petersi* n. sp. et *Plasmodium georgesii* n. sp., parasites d'un *Cercocebus albigena* originaire de République Centrafricaine. *Ann Parasitol Hum Comp.* **68**: 203-210.
- Pourrut, X. and V Robert. 2009. Absence d'infection plasmodiale chez les singes sauvages du Nord-Sénégal? *Bull Soc Pathol Exot.* doi:10.3185/pathexo3185.
- Prugnolle, F, P Durand, C Neel, B Ollomo, FJ Ayala, C Arnathau, L Etienne, E Mpoudi-Ngole, D Nkoghe, E Leroy, E Delaporte, M Peeters, and F Renaud. 2010. African great apes are natural hosts of multiple related malaria species, including *Plasmodium falciparum*. *PNAS.* **107**(4): 1458-1463.

- Prugnolle, F, B Ollomo, P Durand, E Yalcindag, C Arnathaua, E Elgueroa, A Berry, X Pourrut, d, J-P Gonzalez, D Nkoghe, J Akiana, D Verrier, E Leroy, FJ Ayala, and F Renaud. 2011. African monkeys are infected by *Plasmodium falciparum* nonhuman primate-specific strains. *PNAS*. **108**(29):11948-11953.
- Reichenow, E. 1920. Ueber das Vorkommen der Malariaparasiten des Menschen bei den afrikanischen Menschenaffen. *Centralbl f Bakteriol*. **85**: 207-216.
- Rich, SM, FH Leendertz, G Xu, M LeBreton, CF Djoko, MN Aminake, EE Takang, JLD Dikko, BL Pike, BM Rosenthal, P Formenty, C Boesch, FJ Ayala, and ND Wolfe. 2009. The Origin of Malignant Malaria. *PNAS*. **106**(35): 14901-14907.
- Rodhain, J. 1938. Les plasmodium des anthropoides de l' Afrique centrale et leur relation avec les plasmodium humains. *Acta Convent Tertii de Trop Atque Malar Morbis*. **2**: 539-544.
- Rodhain, J and R Dellaert. 1943. L'infection a Plasmodium malariae du chimpanzee chez l'homme. Etude d'une premiere souch isolee de l'anthropoide *Pan satyrus verus*. *Ann Soc Belge Med Trop*. **23**: 19-46.
- Schwetz, J. 1933. Sur une infection malarienne triple d'un chimpanzé. *Zentralbl f Bakt I Abt Orig*. **130**: 105- 111.
- Schwetz, J. 1934. Contribution a l'etude des parasites malariens des singes superieurs africains. *Riv Malariol*. **13**: 143-147.
- Thurber, MI, RR Ghai, D Hyeroba, G Weny, A Tumukunde, CA Chapman, RW Wiseman, J Dinis, J Steeil, EC Greiner, TC Friedrich, DH O'Connor, and TL Goldberg. 2013. Co-infection and cross-species transmission of divergent *Hepaticystis* lineages in a wild African primate community. *Int J Parasit*. **43**(8): 613–619.
- Tung, J, A Primus, AJ Bouley, TF Severson, SC Alberts, and GA Wray. 2009. Evolution of a malaria resistance gene in wild primates. *Nature*. **460**(7253): 388-391.
- van den Berghe, L, M Chardome, and E Peel. 1964. The filarial parasites of the eastern gorilla in the Congo. *J Helminthology*. **38**: 349-368.

## AMERICAS

- Clark, HC. 1930. A Preliminary Report on some Parasites in the Blood of Wild Monkeys in Panama. *Am J Trop Med*. **10**(1): 25-41.
- Clark, HC. 1931. Progress in the Survey for Blood Parasites of the Wild Monkeys of Panama. *Am J Trop Med*. **11**: 11-20.
- De Arruda, ME. 1985. Presença do *Plasmodium brasilianum* em macacos capturados na área de enchimento do reservatório da Usina Hidrelétrica de Tucuruí Pará. *Mem Inst Oswaldo Cruz*. **80**: 367-369.

- De Thoisy, B, JC Michel, I Vogel, and JC Vié. 2000. A survey of hemoparasite infections in free-ranging mammals and reptiles in French Guiana. *J Parasit.* **85**(5): 1035-1040.
- De Thoisy, B, I Vogel, JM Reynes, JF Pouliquen, B Carme, M Kazanji, and JC Vié. 2001. Health evaluation of translocated free-ranging primates in French Guiana. *Am J Parasit.* **54**(1): 1-16.
- Deane, LM, JA Ferreira Neto, M Okumura, and MO Ferreira. 1969. Malaria Parasites of Brazilian Monkeys. *Rev Inst Med Trop Sao Paulo.* **11**(2): 71-86.
- Deane, LDM. 1976. Epidemiology of simian malaria in the American continent. *Pan American Health Organization (PAHO)* **317**: 144-163.
- Duarte, AMRC, R Malafronte, C Cerutti Jr., I Curadoa, BR de Paiva, AY Maeda, T Yamasaki, MEL Summa, DVDA Neves, SG de Oliveira, AC Gomesh. 2008. Natural *Plasmodium* infections in Brazilian wild monkeys: Reservoirs for human infections? *Acta Tropica.* **107**: 179-185.
- Dunn, FL and FL Lambrecht. 1963. The Hosts of *Plasmodium brasilianum* Gonder and von Berenberg-Gossler, 1908. *J Parasit.* **49**(2):316-319.
- Fandeur, T, B Volney, C Peneau, B De Thoisy. 2000. Monkeys of the rainforest in French Guiana are natural reservoirs for *P. brasilianum*/ *P. malariae* malaria. *Parasitol.* **120**: 11-21.
- Fonseca, F. 1951. Plasmódio de primata do Brasil. *Memórias do Instituto Oswaldo Cruz.* **49**:543-551.
- Garnham, PCC. 1960. Parasites in South American monkeys. *T Roy Soc Trop Med Hyg.* **54**(6): 1-2.
- Lourenco-de-Oliveira, R and LM Deane. 1995. Simian malaria at two sites in the Brazilian Amazon: I-The infection rates of *Plasmodium brasilianum* in non-human primates. *Memórias do Instituto Oswaldo Cruz.* **90**(3): 331-339.
- Marinkelle, J and ES Grose. 1968. *Plasmodium brasilianum* in Colombian monkeys. *Tropical and Geographical Medicine.* **20**(3): 276-280.
- Porter Jr, JA, CM Johnson, and L De Sousa. 1966. Prevalence of malaria in Panamanian primates. *J Parasit.* **52**(4): 669-670.
- Renjifo, S, C Sanmartín, and J de Zulueta. 1952. A survey of the blood parasites of vertebrates in Eastern Columbia. *Acta Tropica.* **9**(2): 151-169.
- Serrano, J. A. 1967. Infección natural de un araguato, *Alouatta seniculus straminea*, por *Plasmodium brasilianum* en Venezuela [Natural infection of a monkey, *Alouatta seniculus straminea*, by *Plasmodium brasilianum* in Venezuela]. *Acta científica venezolana.* **18**(1): 13-15.

#### **ASIAN SURVEYS:**

- Bennett, GF and M Warren. 1965. Transmission of a new strain of *Plasmodium cynomolgi* to man. *The J Parasit.* **51**(1):79-80.

- Coatney, GR, WE Collins, M Warren, and PG Contacos. 1971. *The Primate Malarias*. US Governmental Printing Office. Washington, DC.
- Choudhury, DS, BN Mohan, S Prakash, and SP Ramakrishnan. 1963. Experimental Susceptibility of Anopheline Mosquitoes to Simian Malaria in the Nilgris, Madras State, South India. *Indian J Malariology*. **17**(4):237-242.
- Collins, WE, M Warren, JC Skinner, and DW Alling. 1970. *Plasmodium inui*: serologic relationships of Asian isolates. *Exp Parasit*. **27**, 507–515.
- Collins, WE, PG Contacos, PCC Garnham, M Warren, and JC Skinner. 1972. *Plasmodium hylobati*: A Malaria Parasite of the Gibbon. *J Parasit*. **58** (1): 123-128.
- Chuang, CH, JC Lien and SY Lin. 1966. Further Studies on Simian Malaria in Taiwan. World Health Organization Bulletin. **66**:567.
- Desowitz, RS. 1970. Observations of the *Hepatocystis* of the White- Cheeked Gibbon (*Hylobates concolor*). *J Parasit*. **56**(3):444-446.
- Dissanaike, AS. 1963. *Plasmodium* infection in Ceylon monkeys. *T Roy Soc Trop Med Hyg*. **57**: 488-489.
- Dissanaike, AS. 1965. Simian malaria parasites of Ceylon. *Bulletin of the World Health Organization* **32**(4):593-597.
- Dissanaike, AS, P Nelson, and PCC Garnham. 1965. Two new malaria parasites, *Plasmodium cynomolgi ceylonensis* subsp. nov. and *Plasmodium fragile* sp. nov., from monkeys in Ceylon. *Ceylon J Med Science*. **14**(1):1-14.
- Donovan, C. 1920. Malaria in Monkeys at the foot of the Nilgris during the Months of May and June, 1919. *Indian J Med Research*. **7**(4): 717-721.
- Donovan, J, W Stokes, R Montrey, and H Rozmiarek. 1983. Hematologic characterization of naturally occurring malaria (*Plasmodium inui*) in cynomolgus monkeys (*Macaca fascicularis*). *Laboratory Animal Science*. **33**(1):86-90.
- Dunn, FL, BL Lim, and LF Yap. 1968. Endoparasite Patterns in Mammals of Malayan Rain Forest. *Ecology*. **49**(6): 1179-1184.
- Eyles, D and M Warren. 1962. *Plasmodium inui* in Sulawesi. *J Parasit*. **48**(5):739.
- Eyles, D and M Warren. 1963. *Hepatocystis* from *Macaca irus* in Java. *J Parasit*. **49**(6):891.
- Eyles, DE, ABG Laing, and CG Dobrovolsky. 1962a. The malaria parasites of the pig-tailed macaque, *Macaca nemestrina nemestrina* (Linnaeus), in Malaya. *Indian J Malariology*. **16**(3): 285-298.

- Eyles, DE, ABG Laing, M Warren, and AA Sandosham. 1962b. Malaria Parasites of the Malayan leaf monkeys of the genus *Presbytis*. *Medical J of Malaya*. **17**(2):85-86.
- Eyles, D, YL Fong, M Warren, E Guinn, AA Sandosham, and RH Wharton. 1962c. *Plasmodium coatneyi*, a new species of primate malaria from Malaya. *AJTMH*. **11**: 597–604.
- Eyles, D, YL Fong, FL Dunn, E Guinn, M Warren, and AA Sandosham. 1964. *Plasmodium youngi* n. sp., a malaria parasite of the Malayan gibbon, *Hylobates lar lar*. *AJTMH*. **13**:248.
- Fong, YL, LM Liat, GF De Witt, M Krishnasamy, S Sivanandam, and PYK Foong. 1977. Protozoan and helminth parasites of small wild animals in a new Felda settlement Jenderak Utara, central Pahang, Peninsular Malaysia. *Southeast Asian J Trop Med and Public Health*. **8**(3): 345-353.
- Garnham, PCC. 1966. Malaria Parasites and other Haemosporidia. Blackwell Scientific Publications, Oxford, UK.
- Green, R. 1932. A malarial parasite of Malayan monkeys and its development in anopheline mosquitoes. *T Roy Soc Trop Med Hyg*. **25**(6): 455-477.
- Ho, GC, CL Lee, MJ Abie, ZZ Zainuddin, JRR Japnin, R. Topani, S Sumita, and RSK Sharma. 2010. Prevalance of *Plasmodium* in the Long-tailed (sic) Macaque (*Macaca fascicularis*) from Selangor, Malaysia. *13th Association of Institutions for Tropical Veterinary Medicine (AITVM) Conference 23-26 August Bangkok, Thailand* 49-50.
- Hodgkin, EP. 1950. The *Anopheles umbrosus* group (Diptera: Culicidae). II. Biology and transmission of malaria. *Trans R Entomol Soc London*. **101**: 319-334.
- Howard, LM and BD Cabrera. 1961. Simian malaria in the Philippines. *Science*. **134** (3478): 555.
- Hsieh, H-C. 1960. Malaria Parasites of the Taiwan Monkey. *Formosan Science*. **14**(5):477-487.
- Huang, C-C, D-D Ji, Y-C Chiang, H-J Teng, H-J Liu, C-D Chang, and Y-H Wu. 2010. Prevalence and molecular characterization of *Plasmodium inui* among Formosan macaques (*Macaca cyclopis*) in Taiwan. *J Parasit*. **96**(1):8-15.
- Huang, Y, Z Yang, C Putaporntip, M Miao, H Wei, C Zou, S Jongwutiwes, and L Cui. 2011. Isolation and identification of a South China strain of *Plasmodium inui* from *Macaca fascicularis*. *Veterinary Parasitology*. **176**(1):9-15.
- Jayewardene, LG. 1963. Morphology of the erythrocytic stage of *Plasmodium inui* Halberstadter and Prowazek, 1907, in the toque monkey, *Macaca sinica* from Ceylon. *Indian J. Malariol* **17**: 365-372.
- Jeslyn, W, T Huat, L Vernon, L Irene, LK Sung, LP Jarrod, B Singh, and NL Ching. 2011. Molecular Epidemiological Investigation of *Plasmodium knowlesi* in Humans and Macaques in Singapore. *Vector-borne and Zoonotic Diseases*. **11**(2): 131-135.



- Kalra, NL. 1980. Emergence of malaria zoonosis of simian origin as a natural phenomenon in Greater Nicobars, Andaman & Nicobar Islands- a preliminary note. *J Commun Diseases*. **12**(1):49-54.
- Lambrecht, FL, FL Dunn, and DE Eyles. 1961. Isolation of *Plasmodium knowlesi* from Philippine macaques. *Nature*. **191**: 1117-1118.
- LeBras, J, B Larouze, M Geniteau, B Andrieu, M-C Dazza, F Rodhain. 1984. Malaria, arbovirus and hepatitis infections in *Macaca fascicularis* from Malaysia. *Laboratory Animals*. **18**: 61-64.
- Lee K-S, PCS Divis, SK Zakaria, A Matusop, RA Julin, DJ Conway, J Cox-Singh, and B Singh. 2011. *Plasmodium knowlesi*: Reservoir Hosts and Tracking the Emergence in Humans and Macaques. *PLoS Pathogens*. **7**(4): e1002015.
- Mathis, C and M Leger. 1911. *Plasmodium* des macaques du Tonkin. *Annales de l'Institut Pasteur*. **25**: 593-600.
- Matsubayashi, K and D Sajuthi. 1981. Microbiological and Clinical Examinations of Cynomolgus Monkeys in Indonesia. *Kyoto University Overseas Report of Studies on Indonesian Macaque*. **1**: 47-56.
- Mayer, M. 1907. Ueber Malaria beim Affen. *Med Klin Bed*. **3**: 579-580.
- Mulligan, HW and CS Swaminath. 1940. Natural infection with *Plasmodium inui* in *Silenus sinicus* from South India. *J Malaria Institute of India*. **3**(4): 603-604
- Nelson, P. 1971. *Anopheles elegans*, a natural vector of simian malaria in Ceylon. *T Roy Soc Trop Med Hyg*. **20**(2):46-51.
- Otsuru, M and H Sekikawa. 1979. Surveys of Simian Malaria in Japan. *Zbl Bakt-Int J Med M*. **244**(2-3):345-350.
- Pacheco, MA, MJC Reid, MA Schillaci, CA Lowenberger, BMF Galdikas, L Jones-Engel, and AA Escalante. 2012. The Origin of Malarial Parasites in Orangutans. *PLoS ONE*. **7**, e34990.
- Palmieri, JR, Purnomo, VH Lee, DT Dennis, and HA Marwoto. 1980. Parasites of the Silvered Leaf Monkey, *Presbytis cristatus* Eschscholtz 1921, with a Note on a Wuchereria-Like Nematode. *J Parasit*. **66**(1): 170-171.
- Pattanayak, S. 1963. A Note on Natural Simian Malaria Infection in Kerala State, India. *Indian J Malariology*. **17**:293-294
- Peters, W, PCC Garnham, R Killick-Kendrick, N Rajapaksa, WH Cheong, and FC Cadigon. 1976. Malaria of the Orang-Utan (*Pongo pygmaeus*) in Borneo. *Phil Trans Roy Soc of London Series B, Biological Sciences*. **275**(941): 439-482.
- Peyton, EL and BA Harrison. 1980. *Anopheles* (Cellia) *takagoensis* Morishita 1946, an additional species in the Balabacensis complex of Southeast Asia (Diptera: Culicidae). *Mosquito Systematics*. **17**(3): 335-347.

- Prakash, S and SC Chakrabarti. 1962. The Isolation and description of *Plasmodium cynomolgi* (Mayer 1907) and *Plasmodium inui* (Halberstadter and Prowazek, 1907) from naturally occurring mixed infections in *Macaca radiata radiata* monkeys of the Nilgiris, Madras State, India. *Indian J Malariology*. **16** (3): 303-311.
- Putaporntip, C, S Jongwutiwes, S Thongaree, S Seethamchai, P Grynberg, and A Hughes. 2010. Ecology of malaria parasites infecting Southeast Asian macaques: evidence from cytochrome b sequences. *Mol Ecol*. **19**(16): 3466-3476.
- Rain, A, JW Mak, and R Zamri. 1993. Simian malaria infection in wild caught *Macaca fascicularis* and *Presbytis* spp in Malaysia. *Southeast Asian J of Trop Med and Public Health*. **24**(2): 386-387.
- Ramakrishnan, SP and BN Mohan. 1961. Simian malaria in the Nilgiris, Madras State, India. *Bull Nat Soc Ind Mal Mosq Dis*. **9**: 139.
- Ramakrishnan, SP and BN Mohan. 1962. An enzootic focus of simian malaria in *Macaca radiata radiata* Geoffroy of Nilgiris, Madras State, India. *Indian J of Malariology*. **16**(1): 87-94.
- Reid, M. 2005. *Plasmodium* sp. Infections in ex-captive Bornean Orangutans (*Pongo pygmaeus*) housed at the orangutan care center and quarantine, Pasir Panjang, Kalimantan Tengah, Indonesia. Master's Thesis Simon Fraser University.
- Rodhain, J. 1941. Sur un *Plasmodium* du gibbon *Hylobates lensciscus* Geoff. *Acta Biologica Belgica*. **1**: 118-123.
- Prakash S and SC Chakrabarti. 1962. The isolation and description of *Plasmodium cynomolgi* (Mayer, 1907) and *Plasmodium inui* (Halberstadter and Prowazek, 1907) from naturally occurring mixed infections in *Macaca radiata radiata* monkeys of the Nilgiris, Madras State, India. *Indian J Malariol*. **16**: 303-311.
- Schmidt, L, R Greenland, R Rossan, and C Genter. 1961. Natural Occurrence of Malaria in Rhesus Monkeys. *Science*. **133**(3455): 753.
- Schmidt LH, DV Cramer, RN Rossan, and J Harrison. 1977. The characteristics of *Plasmodium cynomolgi* infections in various old world primates. *AJTMH*. **26**(3): 356-372.
- Schmidt, LH, R Fradkin, J Harrison, RN Rossan, and W Squires. 1980. The course of untreated *Plasmodium inui* infections in the rhesus monkey (*Macaca mulatta*). *AJTMH*. **29**(2): 158-169.
- Seethamchai, S, C Putaporntip, S Malaivijitnond, L Cui, and S Jongwutiwes. 2008. Malaria and hepatocystis species in wild macaques, southern Thailand. *AJTMH*. **78**(4): 646-653.
- de Silva, G. S. 1971. Notes on the orang-utan rehabilitation project in Sabah. *Malay Nat J*. **24**:40-77.
- Sinha, S and A Gajanana. 1984. First report of a natural infection with quartan malaria parasite *Plasmodium shortii* in *Macaca fascicularis umbrosa* of Nicobar Islands. *Trans Roy Soc Trop Med and Hyg*. **78**: 567.

- Sinton, JA, and HW Mulligan. 1933a. A critical review of the literature relating to the identification of the malarial parasites recorded from monkeys of the families Cercopithecidae and Colobidae. *Records of the Malaria Survey of India*. **3**: 381–443.
- Sinton, JA, and HW Mulligan. 1933b. Mixed infections in the malaria of the lower monkeys. II. The probable occurrence of mixed infections in some of the older records of monkey malaria. *Records of the Malaria Survey of India*. **3**: 769-808.
- Tsukamoto, M, A Miyata, and I Miyagi. 1978. Surveys on simian malaria parasites and their vector in Palawan Island, the Philippines. *Trop Med*. **20**: 39-50.
- Vythilingam, I, Y Noor Azian, T Huat, A Jiram, Y Yusri, A Azahari, I Nor Parina, A NoorRain and S Lokman Hakim. 2008. *Plasmodium knowlesi* in humans, macaques and mosquitoes in peninsular Malaysia. *Parasites and Vectors*. **1**:26.
- Warren, MW, and RH Wharton. 1963. The vectors of simian malaria: Identity, biology, and geographical distribution. *J Parasit*. **49**: 892-904.
- Warren, M., Bennett, G., Sandosham, A. & Coatney, G. 1965. *Plasmodium eylesi* sp. nov., a tertian malaria parasite from the white-handed gibbon, *Hylobates lar*. *Annals of Trop Med and Parasit*. **59**(4): 500-508.
- Warren, M. W., Coatney, G. R. and Skinner, J. C. 1966. *Plasmodium jefferyi* sp. n. from *Hylobates lar* in Malaya. *J of Parasit*. **52**(1): 9–13.
- Warren, M, W Cheong, H Fredericks, and G Coatney. 1970. Cycles of Jungle Malaria in West Malaysia. *AJTMH*. **19**(3): 383-393.
- Wharton, RH, DE Eyles, MW Warren, and WH Cheong. 1964. Studies to determine the vectors of monkey malaria in Malaya. *Annals of Trop Med and Parasit*. **58**:56-77.
- Wolfe, ND, WB Karesh, AM Kilbourn, J Cox-Singh, EJ Bosi, HA Rahman, AT Prosser, B Singh, M Andau, and A Spielman. 2002. The Impact of Ecological Conditions on the Prevalence of Malaria Among Orangutans. *Vector borne and Zoonotic Diseases*. **2**(2): 97-103.
