# Supplementary figures and images for: Primate malarias: Diversity, distribution and insights for zoonotic Plasmodium
Source: PubMed Central journal article supplement — One Health. 2015 Oct 24;1:66–75. doi: 10.1016/j.onehlt.2015.10.001 (PMC5441356; doi:10.1016/j.onehlt.2015.10.001), 2015-10-24

Figure A.1 Phylogeny of Sampling Effort with Prosimians

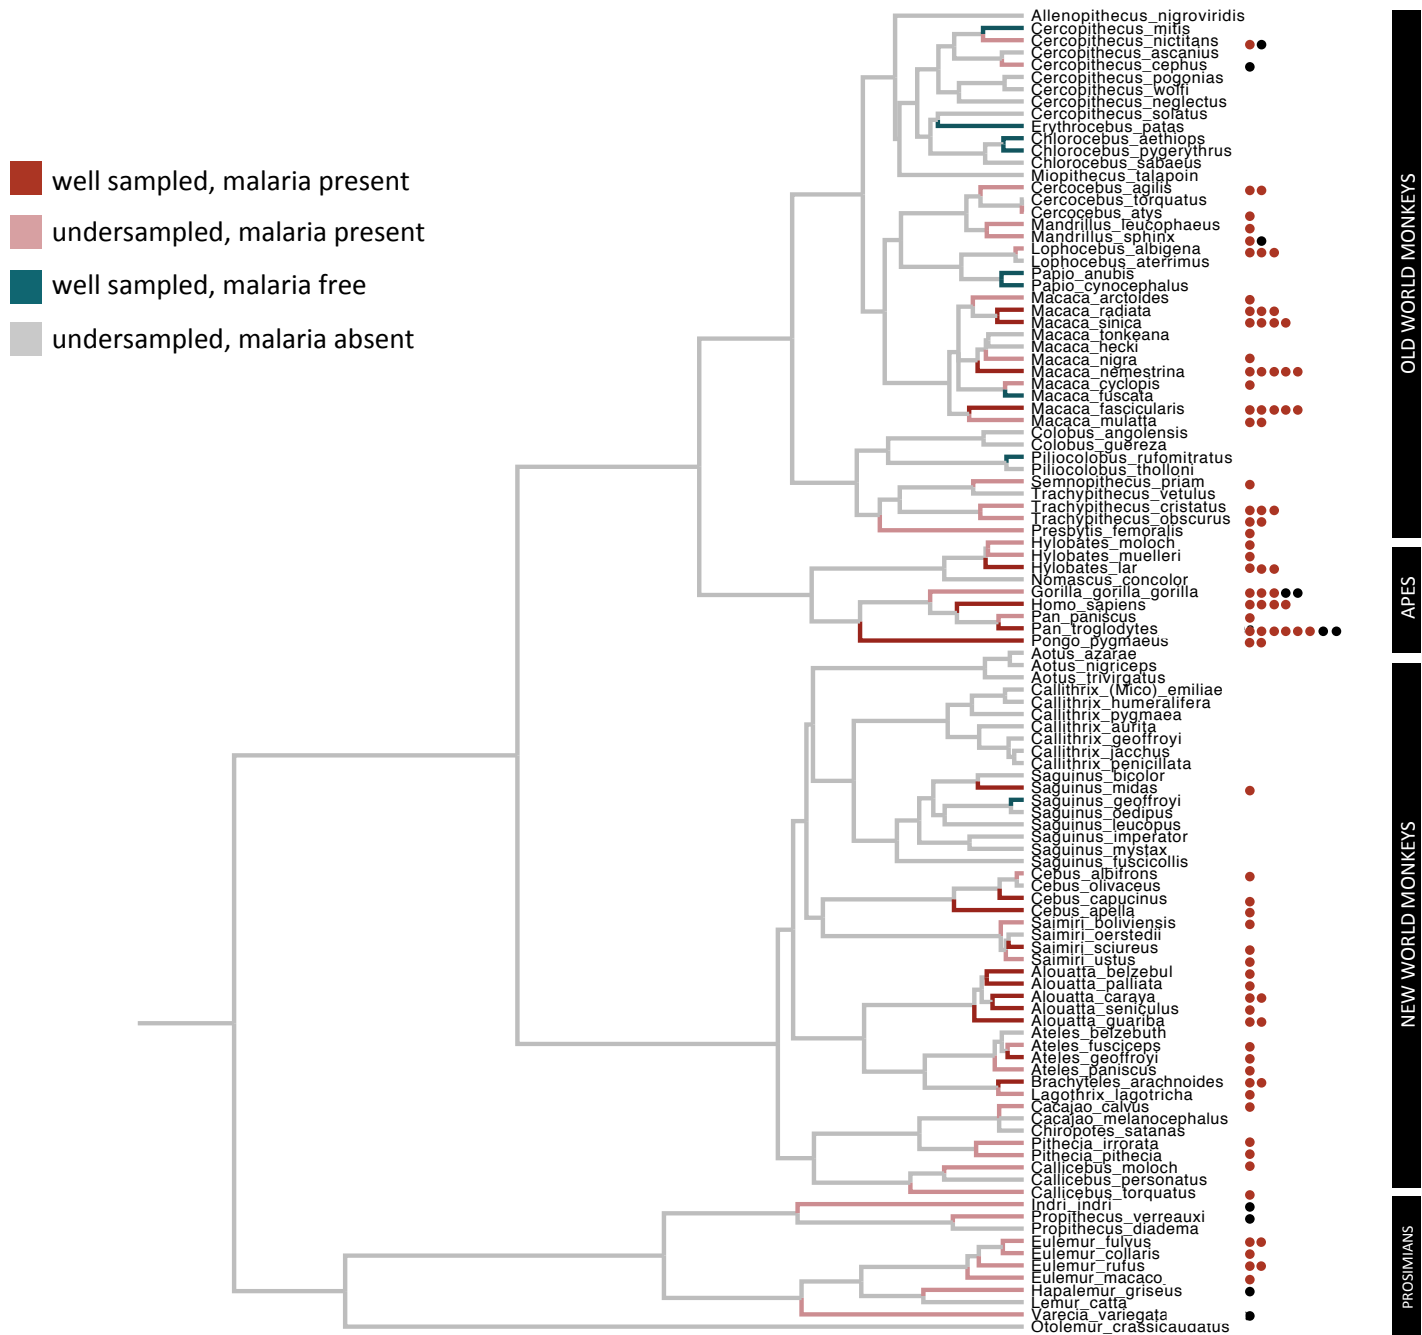

Supplement: mmc2.pdf [file mmc2.pdf]

Figure A.2 Primate *Plasmodium* species accumulation curves by region

**A. Africa**

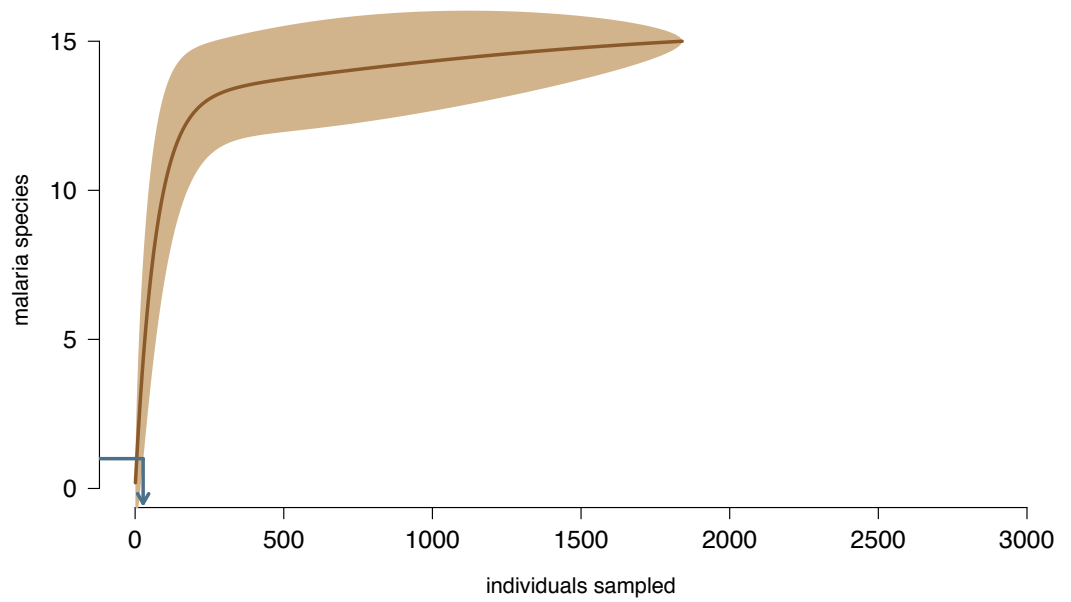

**B. America**

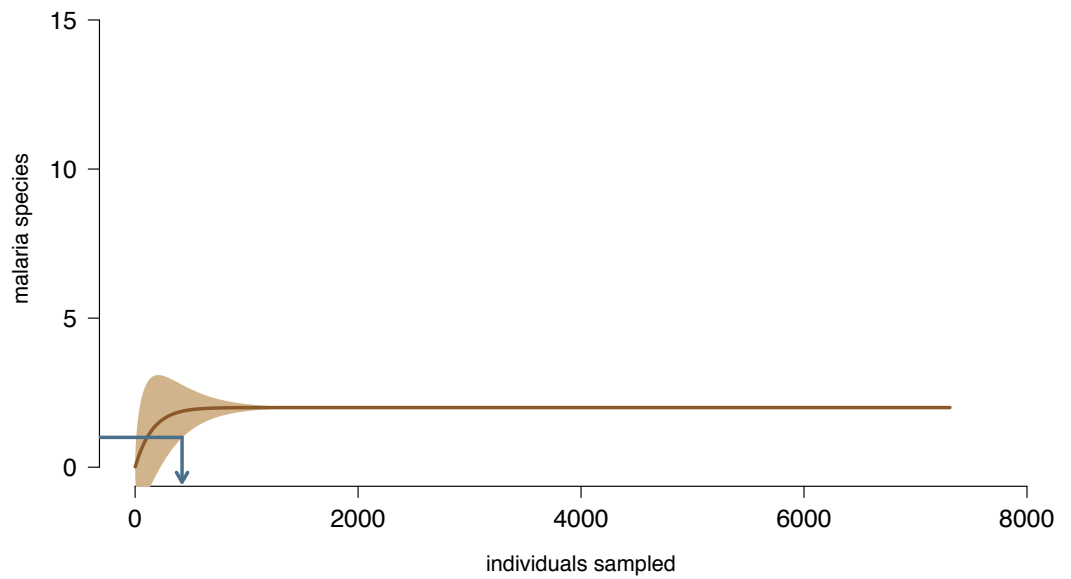

**C. Asia**

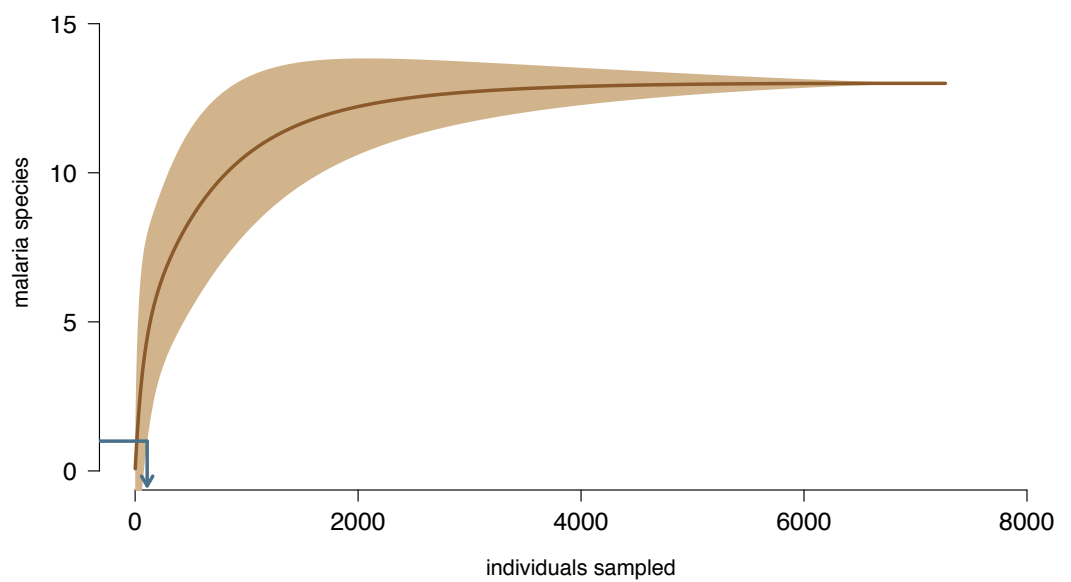

Supplement: mmc3.pdf [file mmc3.pdf]
